# Supplementary material
Source: PubMed Central journal article supplement (PMC6034979)
Supplement: NIHMS931189-supplement-supplement_1.pdf [file NIHMS931189-supplement-supplement_1.pdf]

Tables:

Table 1. (supplementary material)  $\Delta R2^*$  and rCBV values in normal appearing brain regions

|               |                     | Globus pallidus |      | Putamen |      | Thalamus |      |
|---------------|---------------------|-----------------|------|---------|------|----------|------|
|               |                     | mean            | SE   | mean    | SE   | mean     | SE   |
| $\Delta R2^*$ | Gadoteridol         | 12.98           | 0.53 | 16.96   | 0.64 | 19.78    | 0.67 |
|               | 1 mg/kg Ferumoxytol | 14.22           | 1.00 | 18.75   | 1.19 | 21.17    | 1.38 |
|               | 2 mg/kg Ferumoxytol | 38.78           | 2.04 | 49.15   | 2.60 | 50.15    | 1.86 |
| rCBV          | Gadoteridol         | 1.11            | 0.04 | 1.50    | 0.04 | 2.32     | 0.06 |
|               | 1 mg/kg Ferumoxytol | 1.04            | 0.03 | 1.42    | 0.03 | 2.31     | 0.06 |
|               | 2 mg/kg Ferumoxytol | 1.25            | 0.04 | 1.67    | 0.04 | 2.38     | 0.09 |

$\Delta R2^*$ : transverse relaxation rate (1/s), CNR: contrast-to-noise ratio, rCBV: relative cerebral blood volume, SE: standard error.
